# Supplementary material
Source: PubMed Central journal article supplement (PMC2527934)
Supplement: 0805009105_0805009105SI.pdf [file 0805009105_0805009105SI.pdf]

# Supporting Information

Xiang *et al.* 10.1073/pnas.0805009105

SI Text

|           |        | Dimerizer<br>(Hr) | 0     | 3      | 6      | 9     | 12     | 15   | 18   | 21   | 24 |
|-----------|--------|-------------------|-------|--------|--------|-------|--------|------|------|------|----|
|           |        | G1 (%)            | S (%) | G2 (%) | G1 (%) | S (%) | G2 (%) |      |      |      |    |
| 10A.B2    | G1 (%) | 90.8              | 90.6  | 86.1   | 80.5   | 64.7  | 68.8   | 66.6 | 74.3 | 78.4 |    |
|           | S (%)  | 3.4               | 3.7   | 5.3    | 10.9   | 20.7  | 12.7   | 11.1 | 10.2 | 8.9  |    |
|           | G2 (%) | 5.7               | 5.5   | 8.4    | 7.9    | 13.6  | 17.7   | 21.4 | 14.3 | 11.8 |    |
| 10A.B2Brk | G1 (%) | 88.3              | 83.7  | 83.7   | 68.3   | 60.1  | 65.9   | 65.7 | 74.4 | 78.4 |    |
|           | S (%)  | 4.5               | 6.1   | 6.5    | 20.1   | 23.2  | 15.1   | 11.2 | 8.5  | 8    |    |
|           | G2 (%) | 7                 | 10.1  | 9.5    | 11.4   | 16.5  | 18.9   | 23   | 17   | 13.4 |    |

**Fig. S1.** Effect of Brk expression on ErbB2-induced cell cycle progression. Parental ErbB2 expressing MCF-10A cells (10A.B2) or cells coexpressing ErbB2 and Brk were stimulated with dimerizer to activate ErbB2. Cells were fixed at indicated times after stimulation, stained with propidium iodide, and analyzed by flow cytometry. Percentage of cells in G<sub>1</sub> or S or G<sub>2</sub> phase of the cell cycle is shown.
